# Supplementary material
Source: Elsevier journal article supplement (https://www.sciencedirect.com/science/article/pii/S1579212920301130)
Supplement: mmc1 [file S1579212920301130:mmc1.pdf]

**Table 3.** Positive End-Expiratory Pressure and Fraction of Inspired Oxygen at 1<sup>st</sup>, 6<sup>th</sup>, 12<sup>th</sup>, and 24<sup>th</sup> Hours

| Time intervals                      | Variables                 | Bi-nasal short prong<br>(mean±SD) | Nasal mask<br>(mean±SD) | P     |
|-------------------------------------|---------------------------|-----------------------------------|-------------------------|-------|
| <b>1<sup>st</sup> hour (n: 62)</b>  |                           | <b>n: 31</b>                      | <b>n: 31</b>            |       |
|                                     | PEEP (cmH <sub>2</sub> O) | 5.03±0.18                         | 5.1±0.30                | 0.310 |
|                                     | FiO <sub>2</sub> (%)      | 29.19±3.67                        | 30.16±3.76              | 0.309 |
| <b>6<sup>th</sup> hour (n: 41)</b>  |                           | n: 21                             | n: 20                   |       |
|                                     | PEEP (cmH <sub>2</sub> O) | 5.17±0.67                         | 5.11±0.31               | 0.738 |
|                                     | FiO <sub>2</sub> (%)      | 28.50±2.85                        | 30.0±3.87               | 0.168 |
| <b>12<sup>th</sup> hour (n: 24)</b> |                           | n: 12                             | n: 12                   |       |
|                                     | PEEP (cmH <sub>2</sub> O) | 4.92±0.28                         | 5.0±0                   | 0.328 |
|                                     | FiO <sub>2</sub> (%)      | 28.33±3.89                        | 30.0±0                  | 0.211 |
| <b>24<sup>th</sup> hour (n: 7)</b>  |                           | n: 4                              | n: 3                    |       |
|                                     | PEEP (cmH <sub>2</sub> O) | 5.0±0                             | 5.0±0                   | 0.721 |
|                                     | FiO <sub>2</sub> (%)      | 28.33±2.88                        | 27.50±2.88              | 0.723 |

FiO<sub>2</sub> = fraction of inspired oxygen

PEEP = positive end-expiratory pressure
